# Supplementary material
Source: Springer Nature journal article supplement (https://www.springermedizin.de/resource/supplementary/12872_2013_683_MOESM7_ESM.pdf/9430648)

**Fold change in mRNA expression**

■ Undepleted

▣ Collagenase

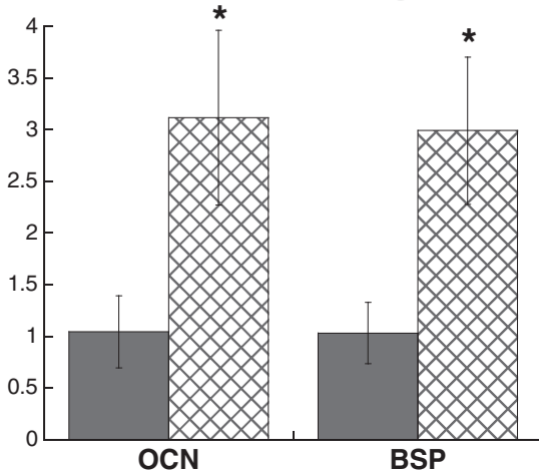

Supplement: MOESM7 [file 9430648]
